# Supplementary material for: ProMetheusDB: An In-Depth Analysis of the High-Quality Human Methyl-proteome
Source: PubMed Central journal article supplement — Mol Cell Proteomics. 2022 May 14;21(7):100243. doi: 10.1016/j.mcpro.2022.100243 (PMC9207298; doi:10.1016/j.mcpro.2022.100243), 2022-05-14
Supplement: mmc1.pdf [file mmc1.pdf]

## **ProMetheusDB: an in-depth analysis of the high-quality human methyl-proteome**

### **Authors**

Enrico Massignani<sup>1,2</sup>, Roberto Giambruno<sup>1,3,4</sup>, Marianna Maniaci<sup>1,2</sup>, Luciano Nicosia<sup>1+</sup>, Avinash Yadav<sup>1#</sup>, Alessandro Cuomo<sup>1</sup>, Francesco Raimondi<sup>1,5</sup> and Tiziana Bonaldi<sup>1,6</sup>

### **Affiliations**

<sup>1</sup> Department of Experimental Oncology, European Institute of Oncology IRCCS, 20139 Milan, Italy

<sup>2</sup> European School of Molecular Medicine (SEMM), Milan, Italy

<sup>3</sup> Center for Genomic Science of Istituto Italiano di Tecnologia at European School of Molecular Medicine, Istituto Italiano di Tecnologia, Milan, Italy

<sup>4</sup> Institute of Biomedical Technologies, National Research Council, 20054 Segrate, Milan, Italy

<sup>5</sup> Bio@SNS, Scuola Normale Superiore, 56126 Pisa, Italy

<sup>6</sup> Department of Oncology and Haematology-Oncology, University of Milan, 20122 Milan, Italy

+ Current address: Leukaemia Biology Laboratory, Cancer Research UK Manchester Institute, The University of Manchester, Oglesby Cancer Research Centre Building, Manchester, M20 4GJ, United Kingdom (UK)

# Current address: GSK Vaccines Srl, Siena, Italy

### **Corresponding author information:**

Tiziana Bonaldi: Via Adamello 16, 20139 Milan, Italy; Phone: +390294375123; e-mail: [tiziana.bonaldi@ieo.it](mailto:tiziana.bonaldi@ieo.it); [tiziana.bonaldi@unimi.it](mailto:tiziana.bonaldi@unimi.it)

## SUPPLEMENTARY MATERIAL

**Figure S1. Assessment of the performance of the Machine Learning model within hmSEEKER v2.0.** **A)** We determined the optimal training set size by plotting the model learning curve, which reaches a plateau when the training set size is ~6000. Thus, 6000 doublets (3000 true and 3000 false) were extracted from a dataset of 8052 to train the model via five-fold cross-validation; the remaining 2052 were set aside to serve as a validation set. **B)** Confusion Matrix generated by applying the model to the validation set. **C)** Table panel showing how the doublets in the training set are classified differently by the original hmSEEKER cut-offs and by the machine learning model.

**Figure S2. Comparison between the different protein methylation events detected in our experiments.** **A-B)** Overlap between R-methylated and K-methylated peptides and proteins, respectively. **C)** Bar chart displaying the fraction of each methylation mark identified in each sub-category of the different hmSILAC experiments. Numbers on top of each bar indicate the total number of modifications annotated.

**Figure S3. Structural analysis of protein regions bearing PTMs other than methylation.** **A)** Counts of modified sites that occur in regions annotated as either domains or disordered regions in the MobiDB database, compared to randomly sampled sites. We observed that other PTMs beside K methylation, such as K acetylation and K ubiquitination, occur on domains more frequently than on disordered regions. **B)** Enrichment of PTMs in Intrinsically Disordered Regions (IDRs) predicted by AlphaFold, which confirms the results shown in panel A.

**Figure S4. Cross-talk of R methylation with K acetylation, K ubiquitination and K sumoylation.** **A)** Counts of R-methyl-sites that occur in proximity of a ubiquitination site. As a control, counts of randomly sampled R-sites from the human proteome were also assessed, indicating a significant anti-correlation between R methylation and K ubiquitination. Significance was calculated with a Fisher exact test. **B-C)** The same analysis performed on K acetylation and K sumoylation sites did not indicate significant correlation or anti-correlation of these PTM. Significance was calculated with a Fisher exact test.

**Figure S5. Crystal structures of additional protein pairs emerged from the structural analysis with Mechismo.** **A)** Crystal structure of SRSF1 (orange) and SRPK1 (green). The structure shows R154 of SRSF1 forming hydrogen bonds with E543 and Y549 of SRPK1; methylation of SRSF1 may disrupt the hydrogen bonds and thus reduce the interaction between the two proteins. **B)** Crystal structure of two MAT2A subunits: like the case in panel A, methylation on R264 could impair the hydrogen bond with E57 between two subunits of the dimeric SAM synthase enzyme.

**Figure S6. MS/MS spectra for peptide 27-40 of histone H3.** Complete list of fragmentation spectra that were used to annotate the newly identified histone marks H3S28me and H3T32me (linked to Fig 7D).

**Table S1 (individual Excel file).** The table contains the current version of **ProMetheusDB** and is organized in 6 sheets, as follows:

- “R/K-methyl-sites”: A list of R/K-methyl-sites identified in the initial analysis of all the MS raw data available. For each site, the modification state, the sequence window and the related methyl-peptides are indicated.
- “R/K-methyl-peptides”: A list of R/K-methyl-peptides identified in the initial analysis and unequivocally mapping on one protein. If a peptide was detected in a SILAC experiment, its regulation state is indicated.
- “R/K-methylpeps- ambiguous”: A list of R/K-methyl-peptides identified in the initial analysis and mapping on two or more different proteins. If a peptide was detected in a SILAC experiment, its regulation state is indicated.
- “R/K/D/E/N/Q/S/T/H-methyl-sites”: A list of R/K/D/E/N/Q/S/T/H-methyl-sites identified in the re-analysis of the non-enriched (Input) data. For each site, the modification state, the sequence window and the related methyl-peptides are indicated.
- “R/K/D/E/N/Q/S/T/H-methyl-peptides”: A list of R/K/D/E/N/Q/S/T/H-methyl-peptides identified in the re-analysis of the non-enriched (Input) data and unequivocally mapping on one protein.
- “R/K/D/E/N/Q/S/T/H-methylpeps-ambiguous”: A list of R/K/D/E/N/Q/S/T/H-methyl-peptides identified in the re-analysis of the non-enriched (Input) data and mapping on two or more different proteins.
- “hmSILAC exps summary”: Summary of the hmSILAC experiments analysed to generate the orthogonally validated methylation dataset.
- “SILAC exps summary”: Summary of the SILAC experiments that were combined with the hmSILAC data to generate the comprehensive ProMetheusDB.

**Table S2 (individual Excel file).** Complete results of the functional enrichment analysis performed with the “gprofiler2” R package, as described in the Materials and Methods section. Terms with FDR < 0.01 are highlighted.

The file is organized in 4 sheets, as follows:

- “Clusters”: Functional enrichment of the proteins in the eight clusters shown in Fig 3A (linked to Fig 3B).
- “Regulated-Unregulated Rme”: Functional enrichment of proteins bearing one or more regulated R-methyl-sites (linked to Fig 4B).
- “Cross-talk”: Functional enrichment of proteins on which we observed a significant correlation of R-methyl-sites and phospho-S/T-Y sites (linked to Fig 6B).
- “Non-canonical methylations”: Functional enrichment of proteins bearing D/E/N/Q/S/T/H-methyl-sites (linked to Fig 7B).

A

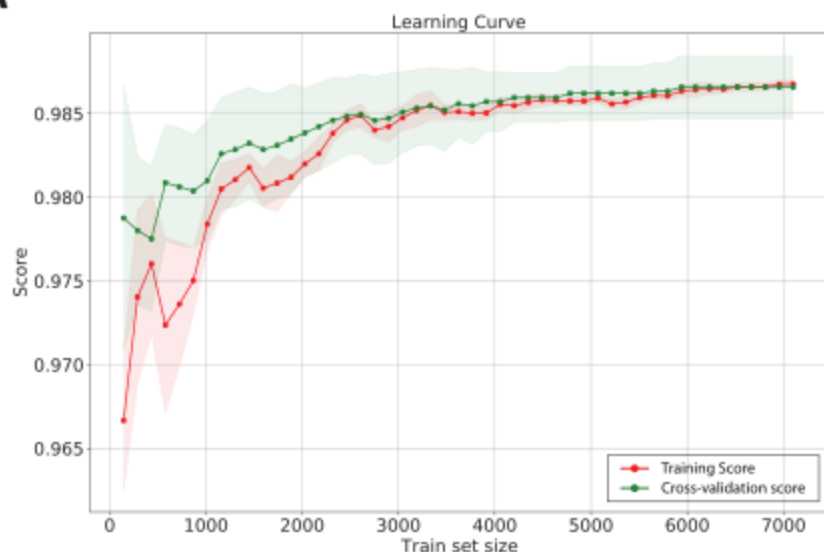

Total Doublets = 8052 doublets  
(4434 True + 3618 False)

Training Set = 6000 doublets  
(3000 True + 3000 False) | 5-fold CV

Validation Set = 2052 doublets  
(1434 True + 618 False)

B

Results on Validation Set  
(Absolute Features)

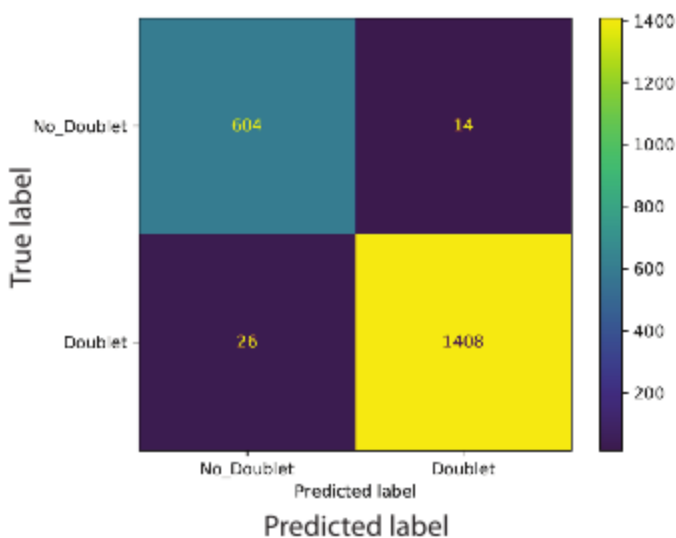

C

| True Label | Prediction based on initial cutoffs | ML Prediction | Counts | %     |                                         |
|------------|-------------------------------------|---------------|--------|-------|-----------------------------------------|
| Positive   | Positive_old                        | Positive_ML   |        |       |                                         |
| False      | False                               | False         | 3511   | 43.6% | True Negative                           |
|            |                                     | True          | 100    | 1.2%  | False Positive we introduce with the ML |
|            |                                     | False         | 0      | 0.0%  | False Positive we remove with the ML    |
| True       | True                                | True          | 7      | 0.1%  | False Positives                         |
|            |                                     | False         | 77     | 1.0%  | False negative                          |
|            |                                     | True          | 768    | 9.5%  | True Positive we recover with ML        |
| True       | True                                | False         | 0      | 0.0%  | False negatives we introduce with ML    |
|            |                                     | True          | 3589   | 44.6% | True Positive                           |
| TOT        |                                     |               | 8052   | 100%  |                                         |

Figure S2

**A**

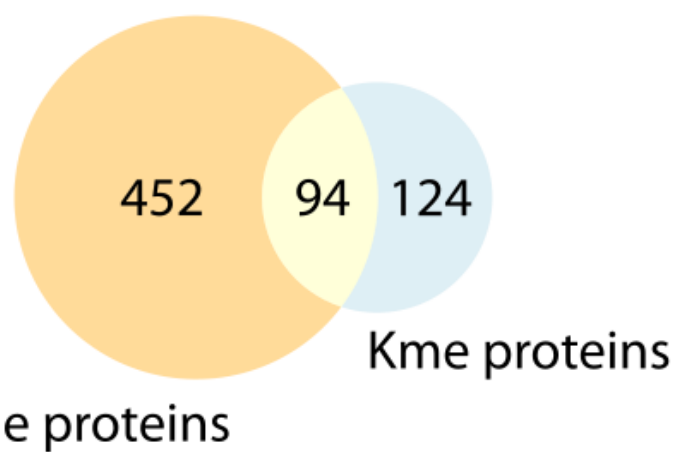

**B**

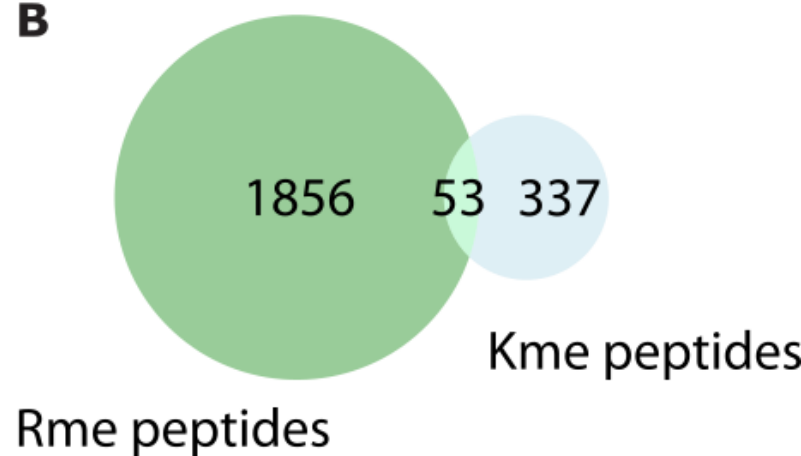

**C**

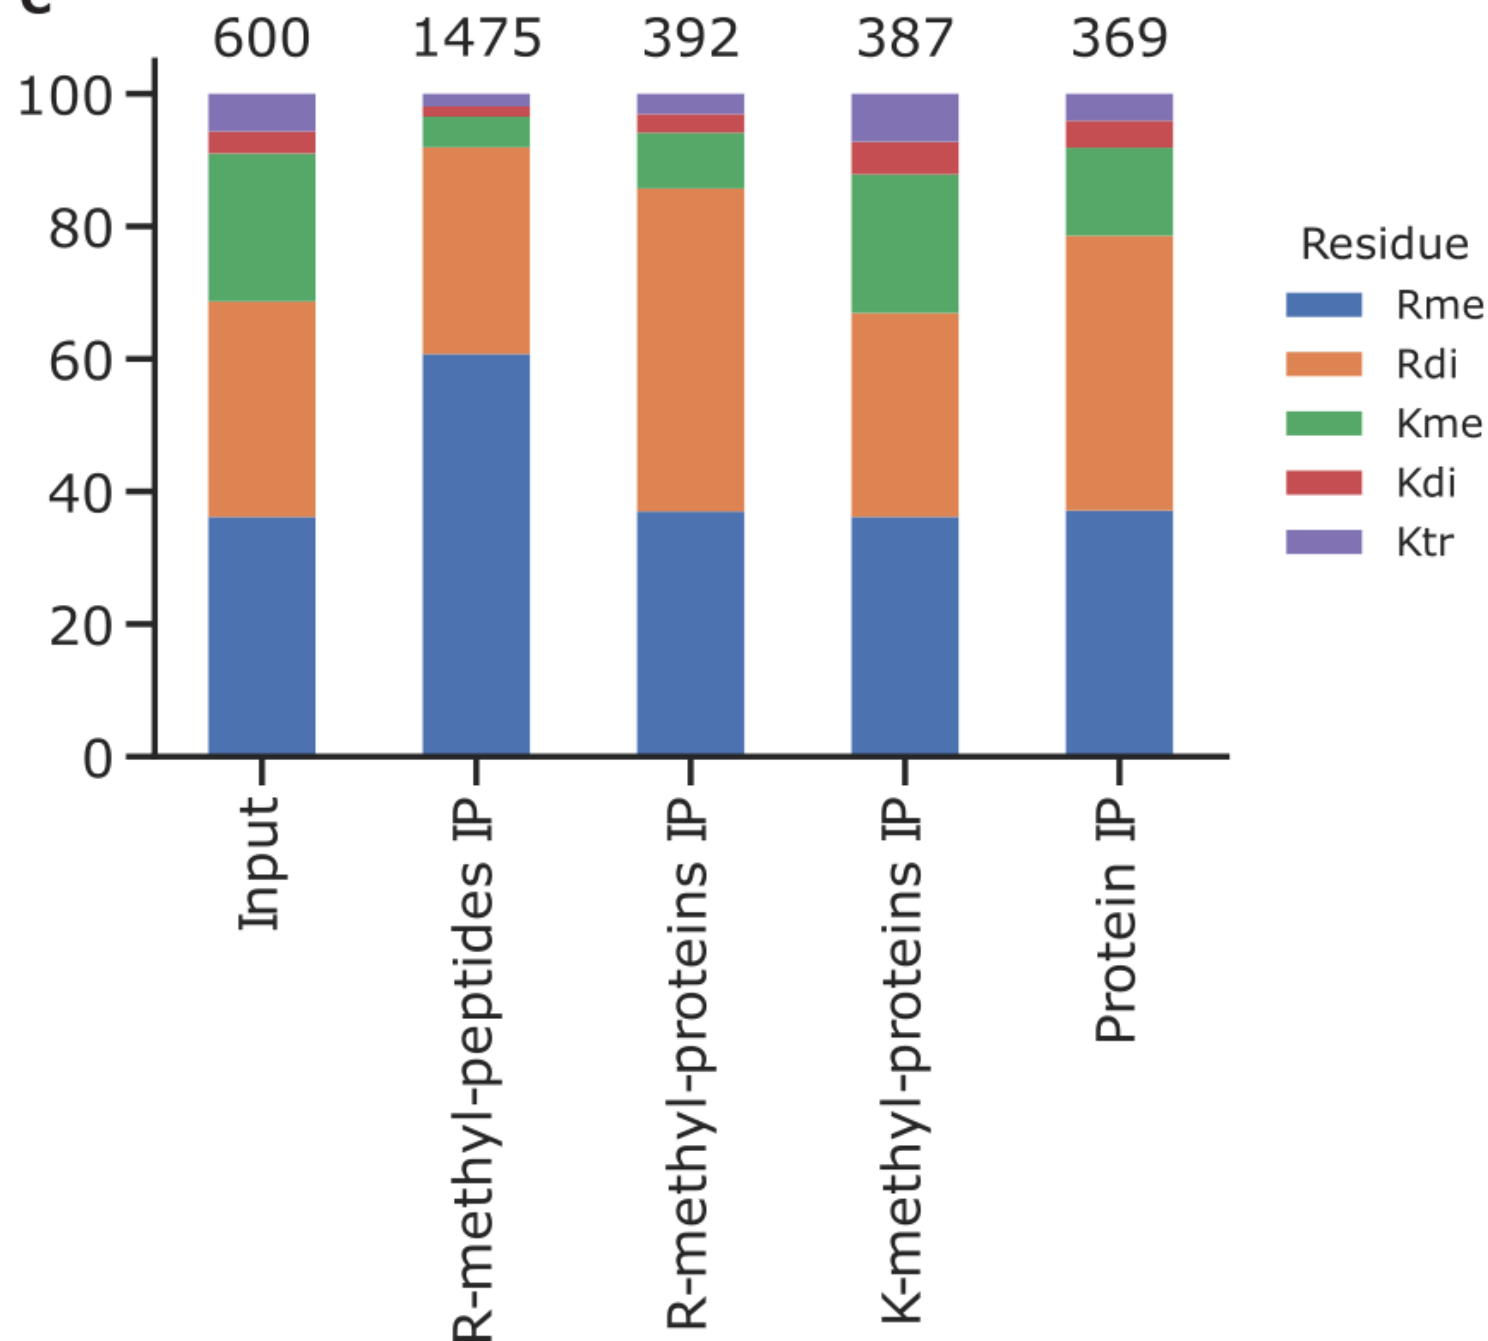

**Figure S3****A**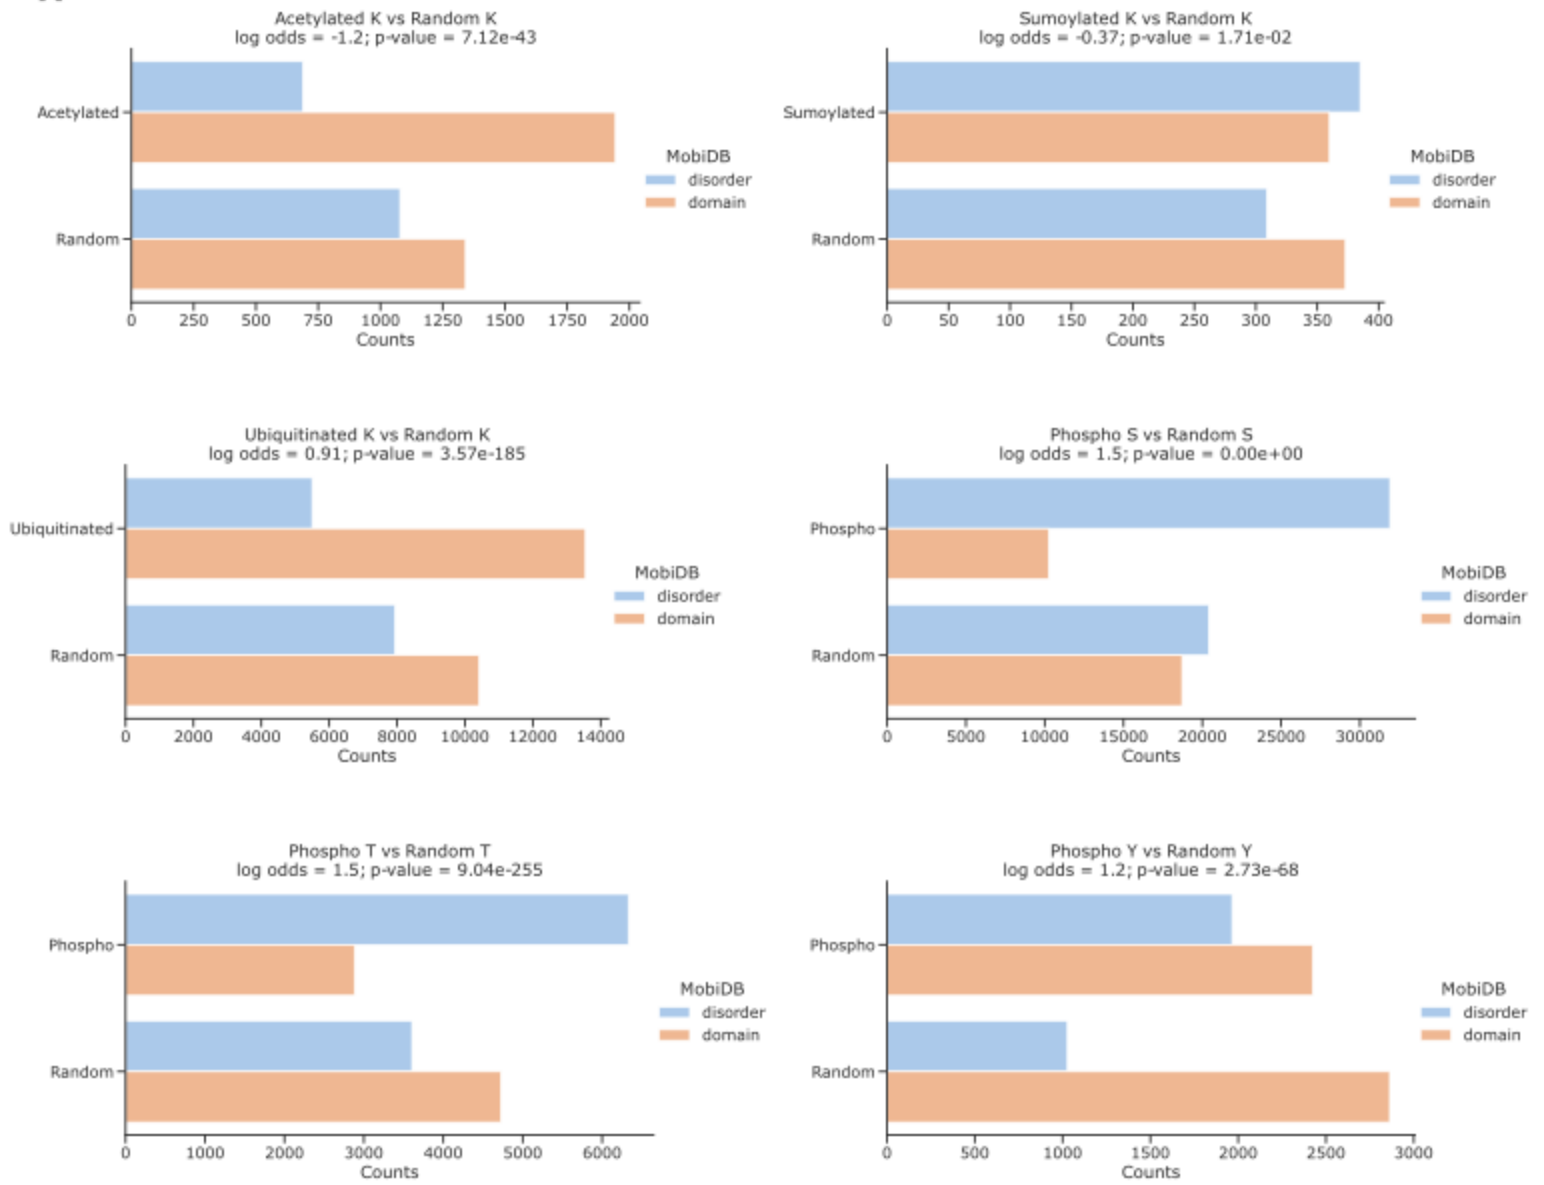**B**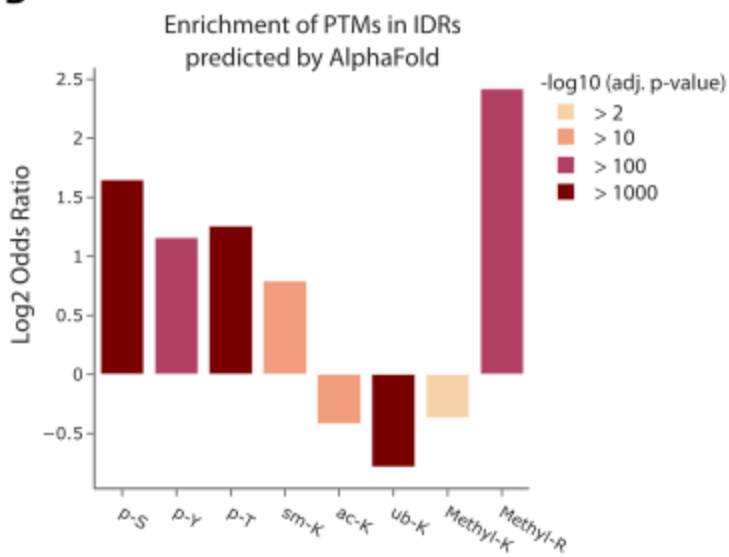

**Figure S4****A**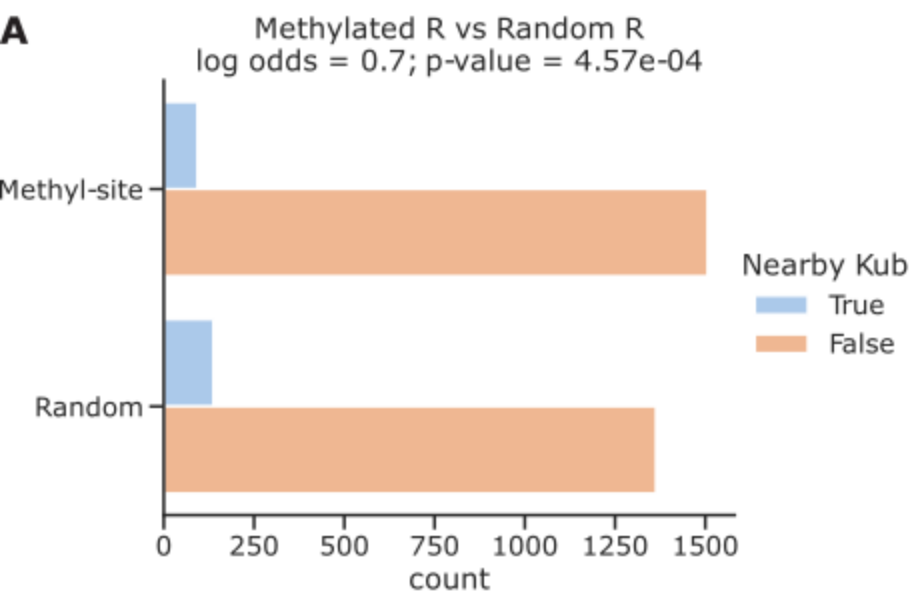**B**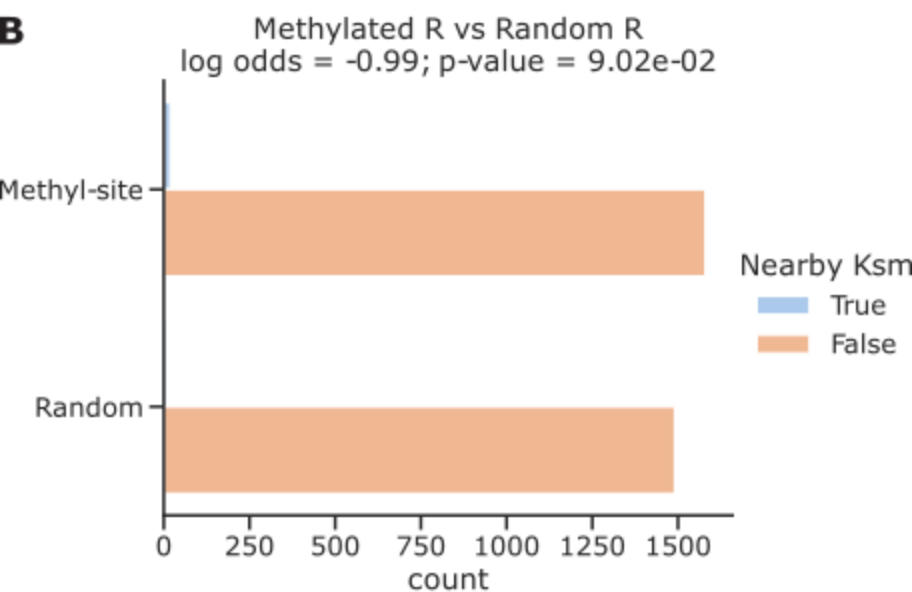**C**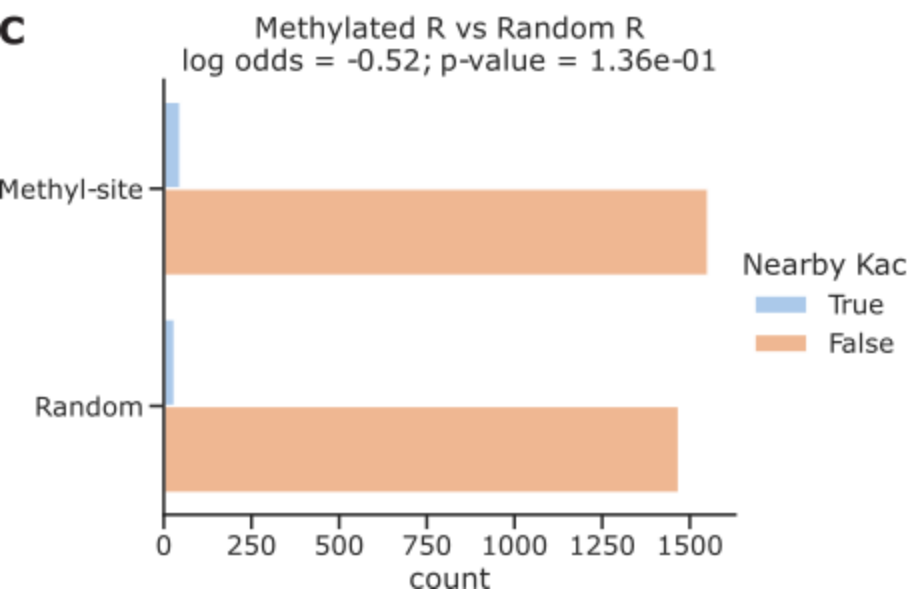

Figure S5

A

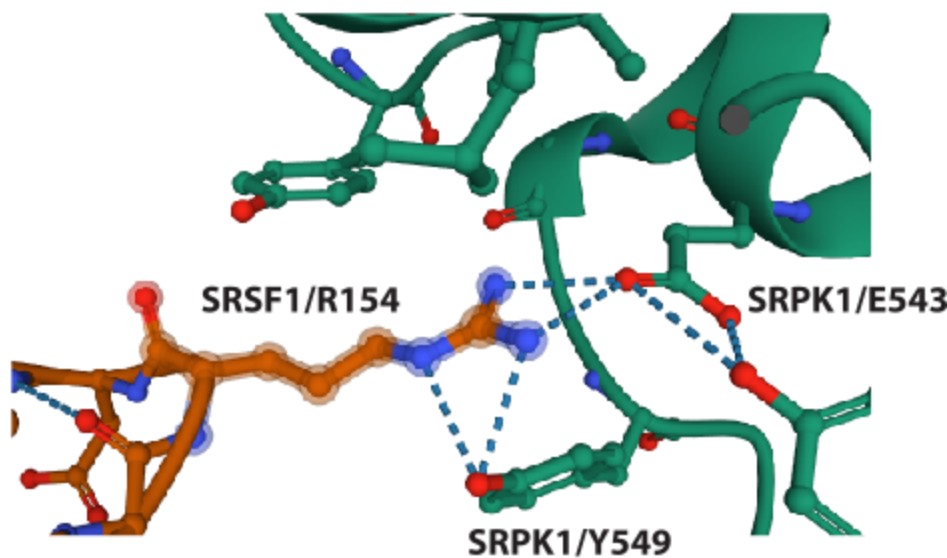

B

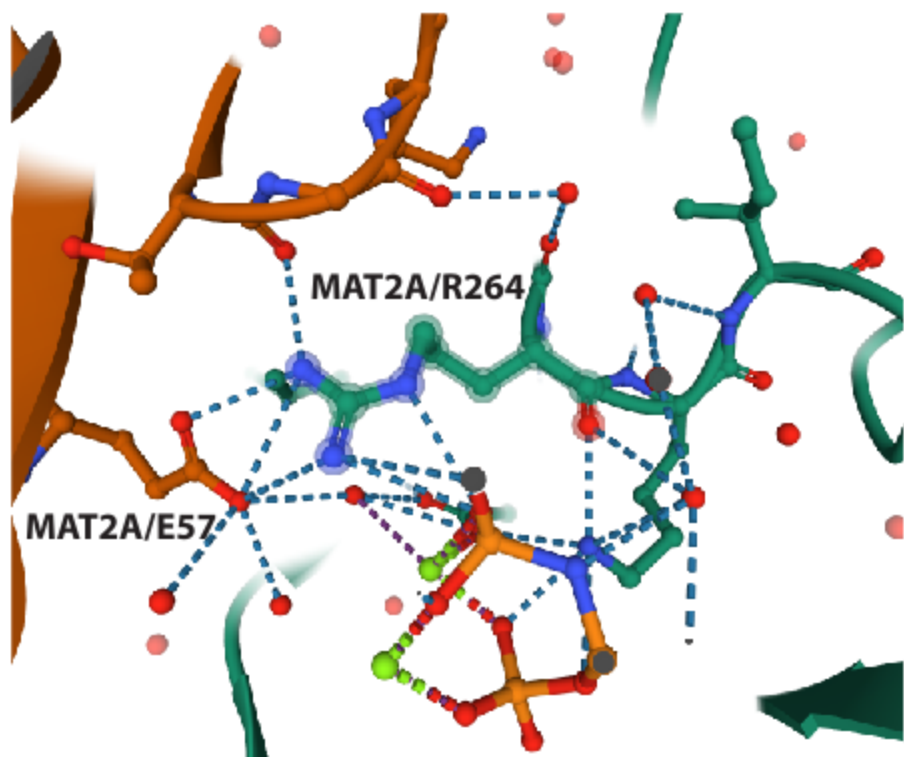



# Figure S6

## A

Raw File  
HF170404\_Histones\_KNR\_lib\_01\_light

Scan  
9107

Method  
FTMS; HCD

Score  
110.14

m/z  
435.93

Gene names  
HIST2H3A; HIST1H3A; HIST3H3; HIST2H3PS2

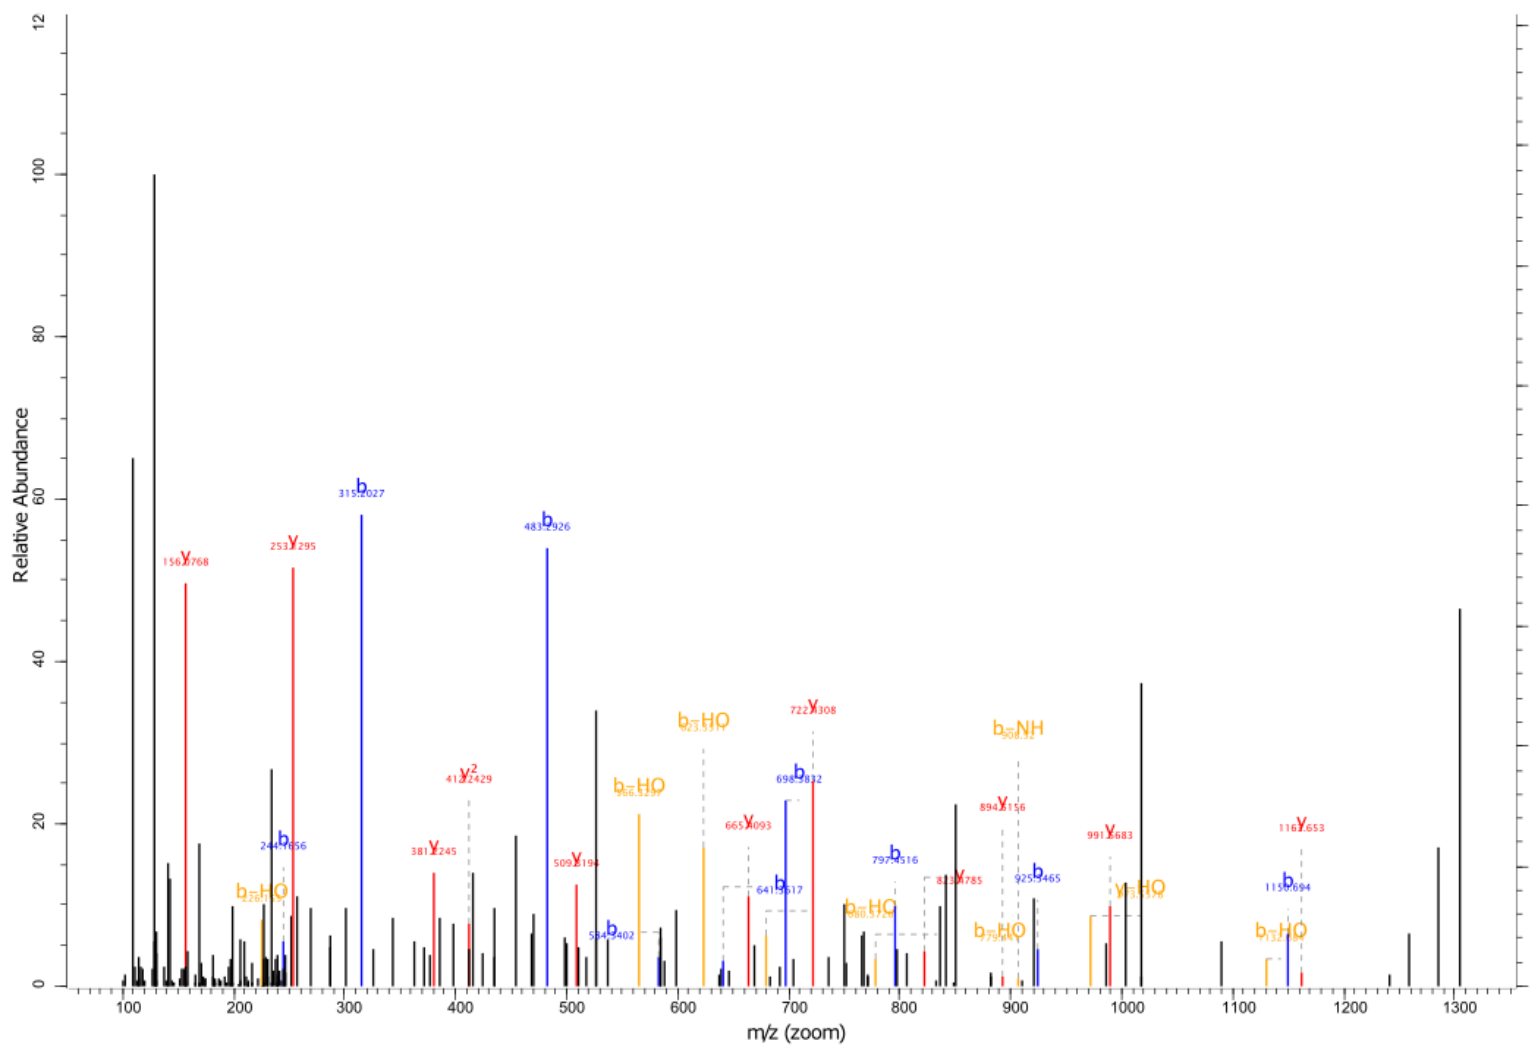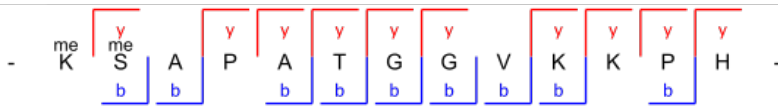

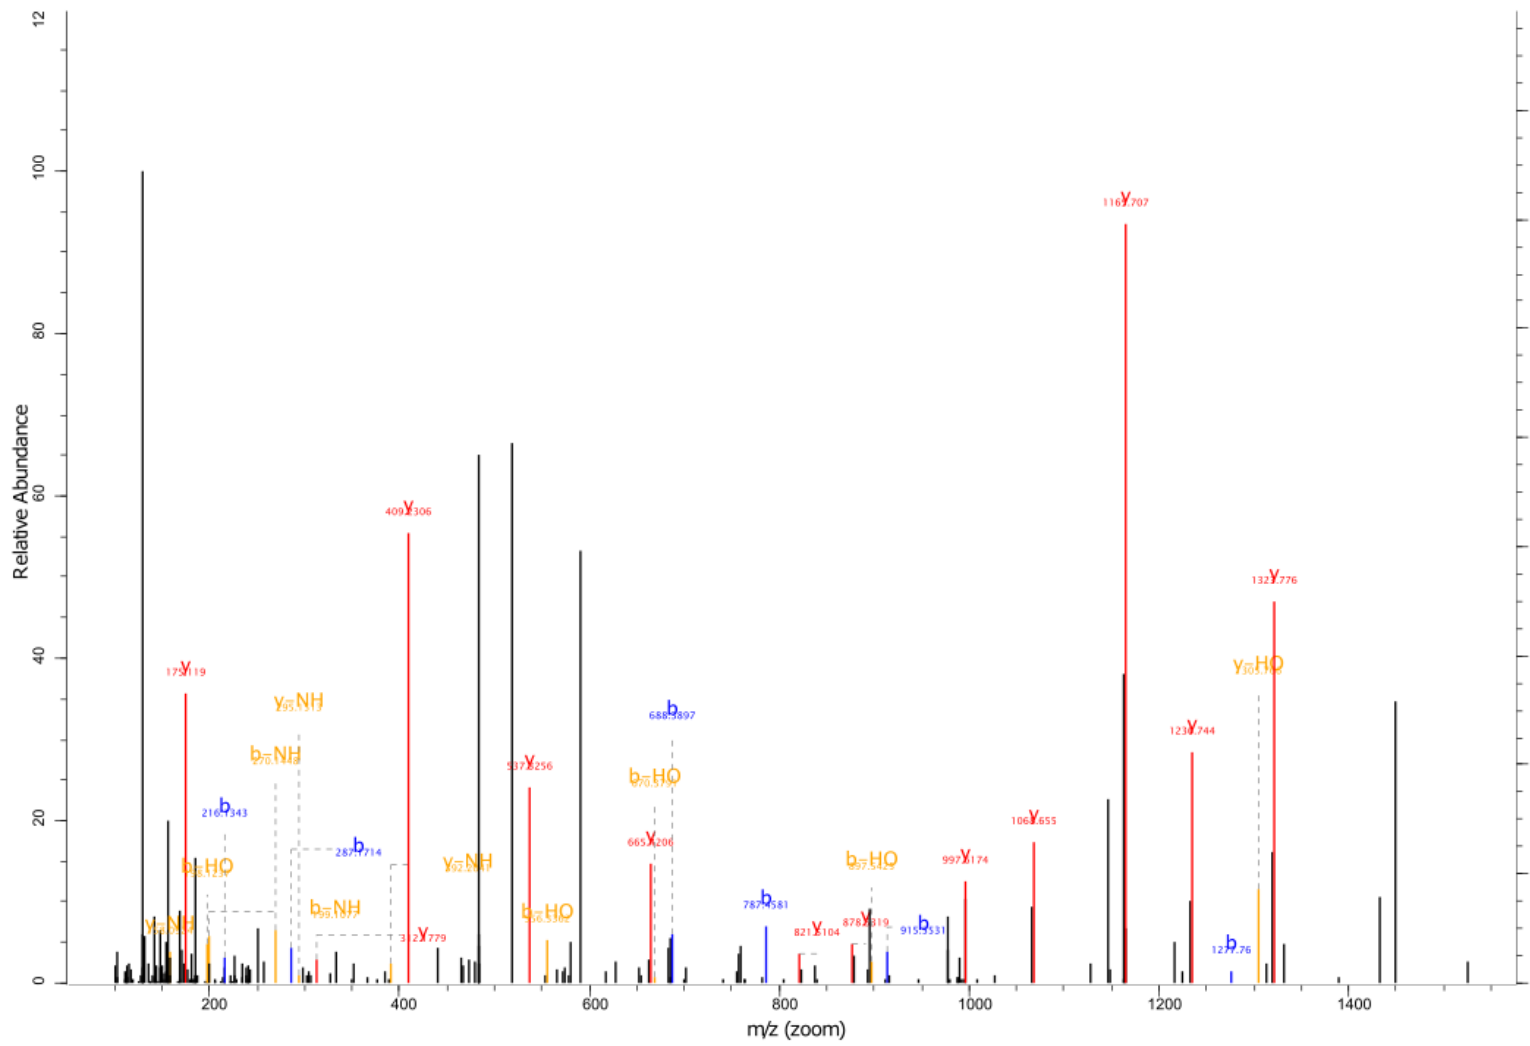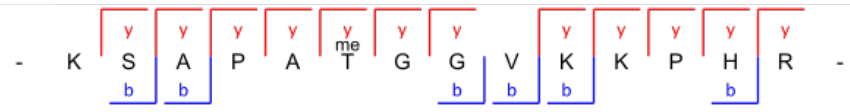

**C**Raw File  
DM\_hmSILAC\_Test\_ArgC\_ambic\_lightScan  
9065Method  
FTMS; HCDScore  
83.5m/z  
483.29Gene names  
HIST2H3A; HIST1H3A; HIST3H3; HIST2H3PS2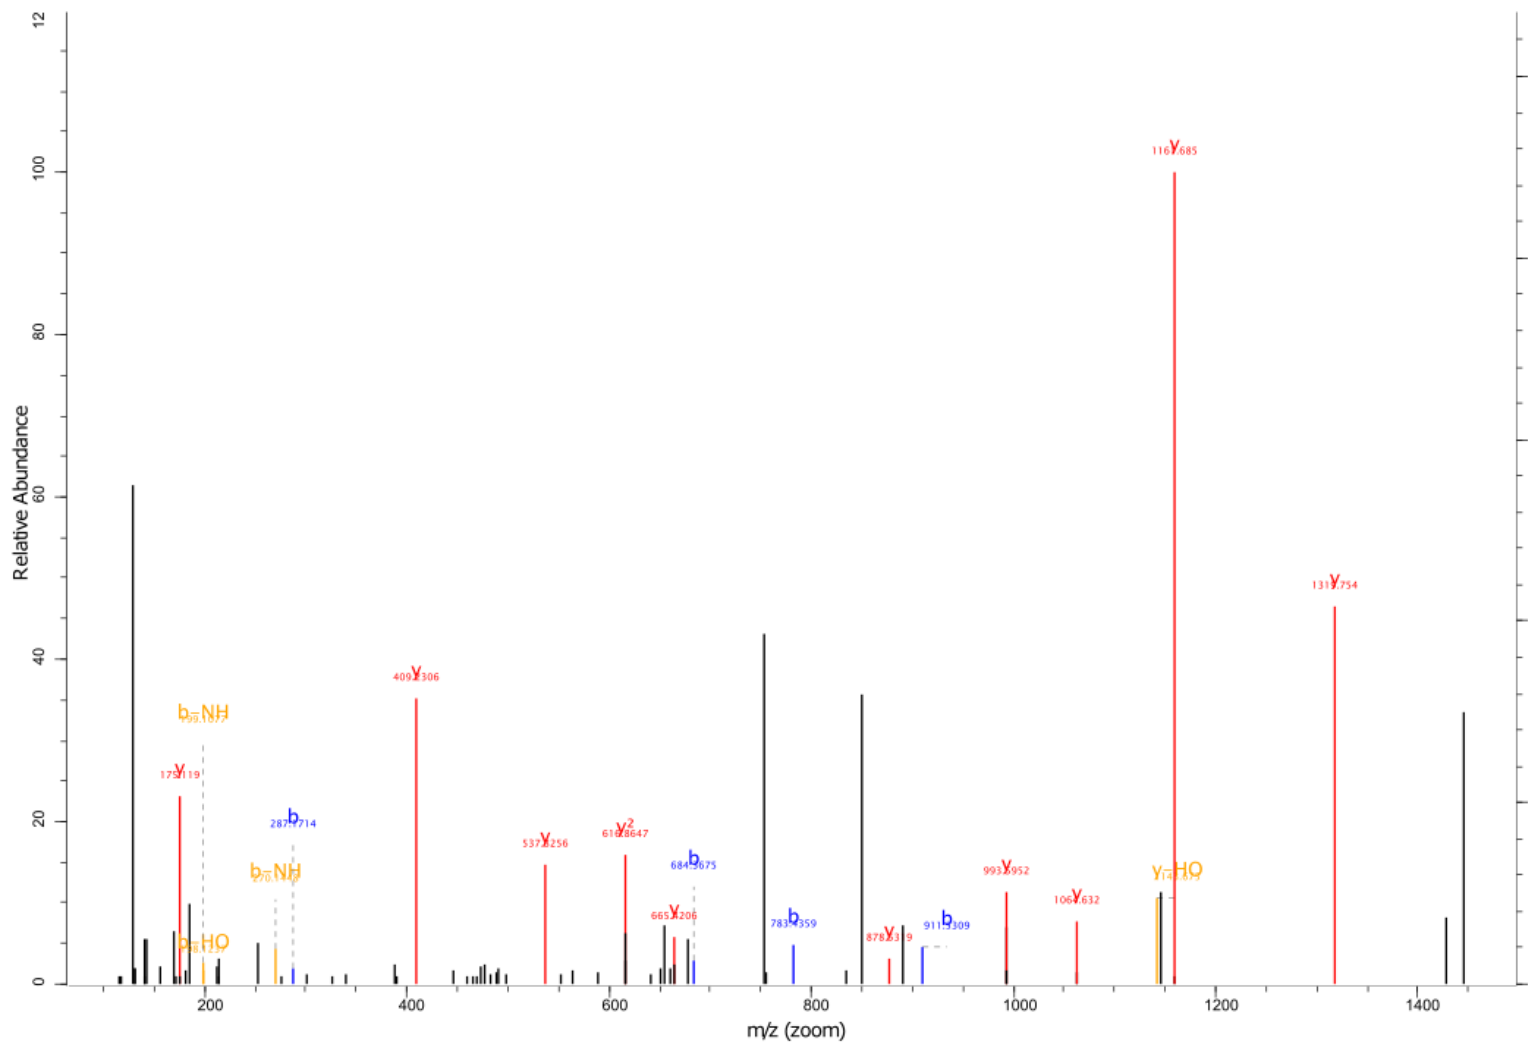

- K S A P A T G G V K K P H R -

Fragmentation scheme showing b and y ions (red and blue boxes) and modifications (me, HO) on the peptide sequence.

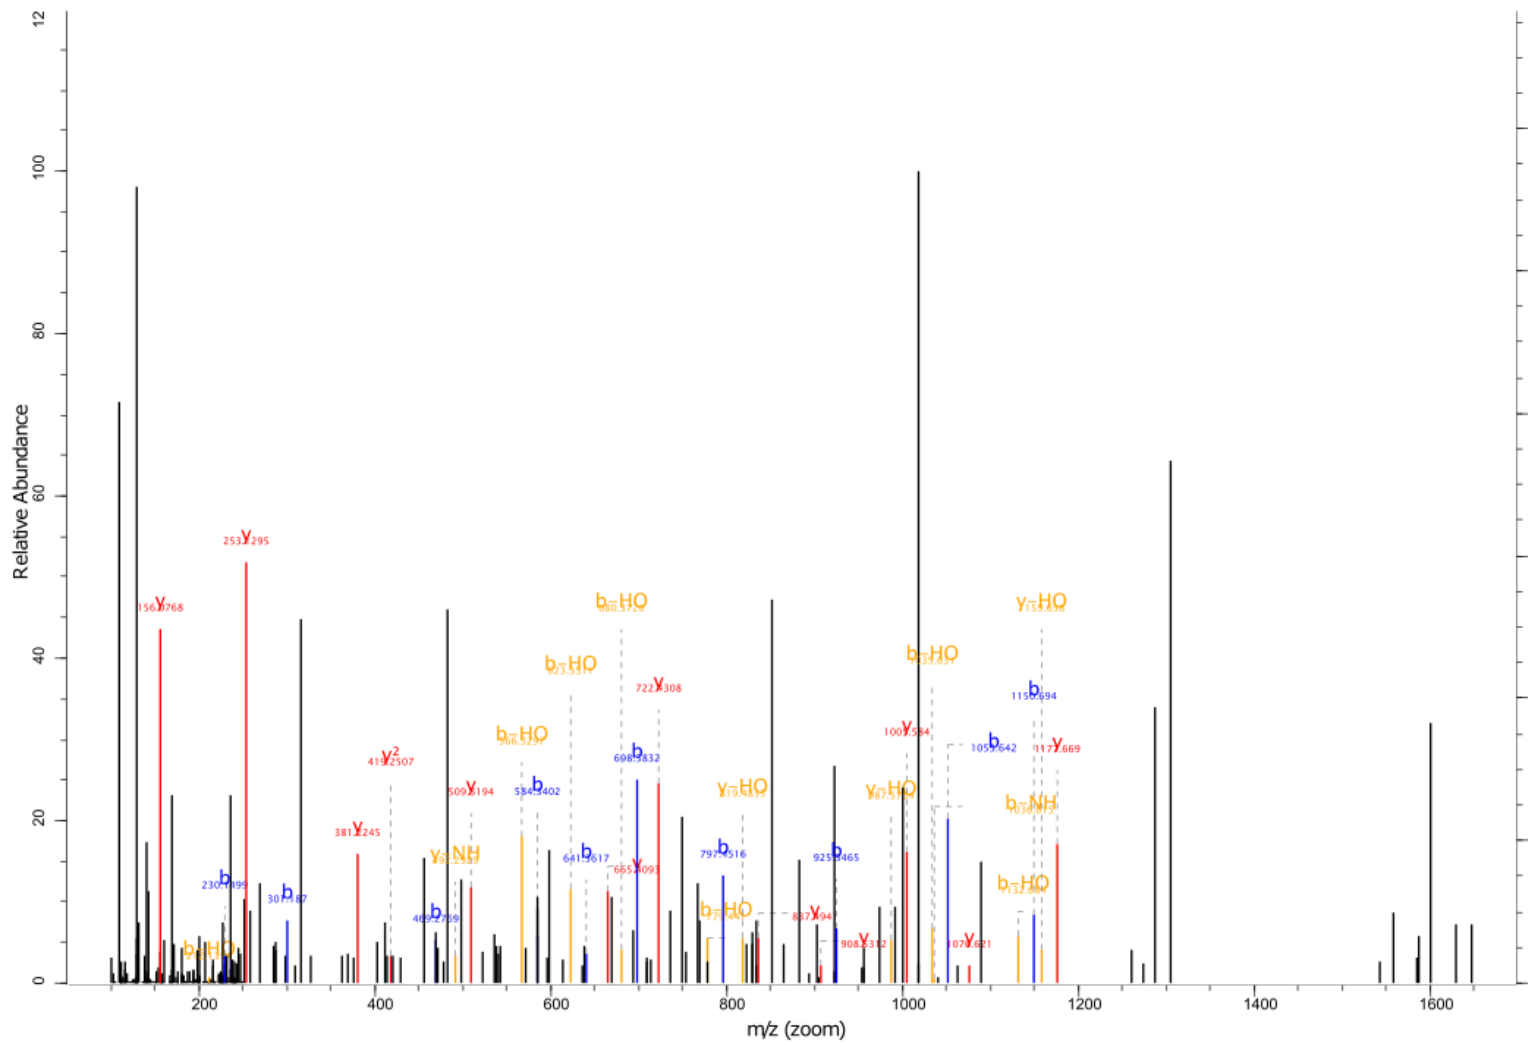

- K Y me S A P Y A Y me T G G V Y K K P H -

b b b b b b b b b b b b b b
